# Supplementary material for: Body size trends in response to climate and urbanization in the widespread North American deer mouse, Peromyscus maniculatus
Source: PubMed Central journal article supplement (PMC7264193; doi:10.1038/s41598-020-65755-x), 2020-06-01
Supplement: 41598_2020_65755_MOESM1_ESM.pdf [file 41598_2020_65755_MOESM1_ESM.pdf]

Supplementary Material

**Body size trends in response to climate and urbanization in the widespread North American deer mouse, *Peromyscus maniculatus***

Robert Guralnick<sup>1\*</sup>, Maggie M. Hantak<sup>1\*</sup>, Daijiang Li<sup>1</sup>, Bryan S. McLean<sup>1,2</sup>

1. Florida Museum of Natural History, University of Florida, Gainesville, FL 32611
2. Department of Biology, University of North Carolina Greensboro, Greensboro, NC 27402

\*These authors contributed equally to this work

Correspondence: Robert Guralnick, E-mail: [robgur@gmail.com](mailto:robgur@gmail.com)

This document includes  
Supplementary Tables S1-S2  
Supplementary Figures S1-S9  
Supplementary Results

## SUPPLEMENTAL TABLES

Table S1. Full model examples to test for (A) variation across space in body mass and HB Length, and (B) temporal body mass and HB Length trends.

---

### (A) Models of Spatial Variation

---

#### Body Mass

```
pema_bm_nn_spat1 <- lmer(body_mass ~ MAP + MAT + sex + season + pop_10km2_log10 + (1 | ecoregion3) + (1 | source), data=pema_nodecade_bodymass_NN2, control = lmerControl(optimizer="Nelder_Mead"))
```

#### HB Length

```
pema_bl_nn_spat1 <- lmer(HB.Length ~ MAP + MAT + sex + season + pop_10km2_log10 + (1 | ecoregion3) + (1 | source), data=pema_nodecade_bodylength_NN2, control = lmerControl(optimizer="Nelder_Mead"))
```

---

### (B) Model including decadal covariates

---

#### Body Mass

```
pema_bm_dec1 <- lmer(body_mass ~ MAP + MAT + sex + decade2 + season + pop_10km2_log10 + (1 + decade2 | zone), data=pema_dec_BM_no_NEON2, control = lmerControl(optimizer="Nelder_Mead"))
```

#### HB Length

```
pema_bl_dec1 <- lmer(HB.Length ~ MAP + MAT + sex + season + decade2 + pop_10km2_log10 + (1+decade2 | zone), data=pema_dec_HBL_noNEON2, control = lmerControl(optimizer="Nelder_Mead"))
```

---

Table S2. Highest-ranking spatial (A-B) and temporal (C-D) model predictors for body mass and HB Length relationships. Results are based on datasets that include juveniles, but do not include NEON as a source. Direction (all negative) of continuous predictor estimates are provided. All predictors in each model were highly significant. The  $\Delta\text{AICc}$  describes the difference in AICc scores between the first and second ranked models.

| <b>Top Model</b>                                          | <b>N</b> | <b>k</b> | <b>AICc</b> | <b>AICcWt</b> | <b><math>\Delta\text{AICc}</math></b> | <b>Marginal <math>R^2</math></b> | <b>Conditional <math>R^2</math></b> |
|-----------------------------------------------------------|----------|----------|-------------|---------------|---------------------------------------|----------------------------------|-------------------------------------|
| <b>(A) Spatial: Body Mass</b>                             |          |          |             |               |                                       |                                  |                                     |
| MAT (-) + MAP (-) + Season + Sex                          | 19644    | 10       | 110561.6    | 0.914         | 4.73                                  | 0.045                            | 0.121                               |
| <b>(B) Spatial: HB Length</b>                             |          |          |             |               |                                       |                                  |                                     |
| MAT (-) + MAP (-) + Season + Sex + Population Density (-) | 27646    | 11       | 192409.8    | 1             | 24.62                                 | 0.035                            | 0.066                               |
| <b>(C) Temporal: Body Mass</b>                            |          |          |             |               |                                       |                                  |                                     |
| MAT (-) + MAP (-) + Season + Sex + Decade (-)             | 11187    | 12       | 62123.8     | 0.653         | 1.49                                  | 0.078                            | 0.201                               |
| <b>(D) Temporal: HB Length</b>                            |          |          |             |               |                                       |                                  |                                     |
| MAT (-) + MAP (-) + Season + Sex + Decade (-)             | 19650    | 12       | 136360.4    | 0.528         | 0.53                                  | 0.036                            | 0.135                               |

Table S3. Highest-ranking spatial model predictors for body mass and HB Length relationships for datasets including NEON as a source (A-B) without juvenile PEMA and (C-D) with juveniles. Direction (all negative) of continuous predictor estimates are provided. All predictors in each model were highly significant. The  $\Delta AICc$  describes the difference in AICc scores between the first and second ranked models.

| <b>Top Model</b>                                          | <b>N</b> | <b>k</b> | <b>AICc</b> | <b>AICcWt</b> | <b><math>\Delta AICc</math></b> | <b>Marginal R<sup>2</sup></b> | <b>Conditional R<sup>2</sup></b> |
|-----------------------------------------------------------|----------|----------|-------------|---------------|---------------------------------|-------------------------------|----------------------------------|
| <b>(A) Spatial: Body Mass</b>                             |          |          |             |               |                                 |                               |                                  |
| MAT (-) + MAP (-) + Season + Sex                          | 22318    | 10       | 124704.7    | 0.655         | 1.28                            | 0.048                         | 0.131                            |
| <b>(B) Spatial: HB Length</b>                             |          |          |             |               |                                 |                               |                                  |
| MAT (-) + MAP (-) + Season + Sex + Population Density (-) | 27460    | 11       | 190870.2    | 1             | 19.41                           | 0.021                         | 0.435                            |
| <b>(C) Spatial: Body Mass</b>                             |          |          |             |               |                                 |                               |                                  |
| MAT (-) + MAP (-) + Season + Sex                          | 22744    | 10       | 127257.4    | 0.802         | 2.80                            | 0.046                         | 0.128                            |
| <b>(D) Spatial: HB Length</b>                             |          |          |             |               |                                 |                               |                                  |
| MAT (-) + MAP (-) + Season + Sex + Population Density (-) | 27914    | 11       | 194339.7    | 1             | 25.05                           | 0.022                         | 0.416                            |

## SUPPLEMENTARY FIGURES

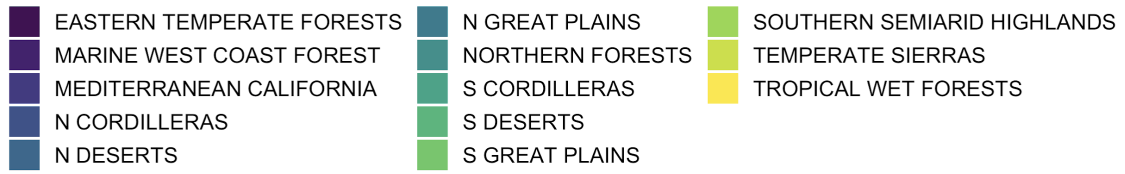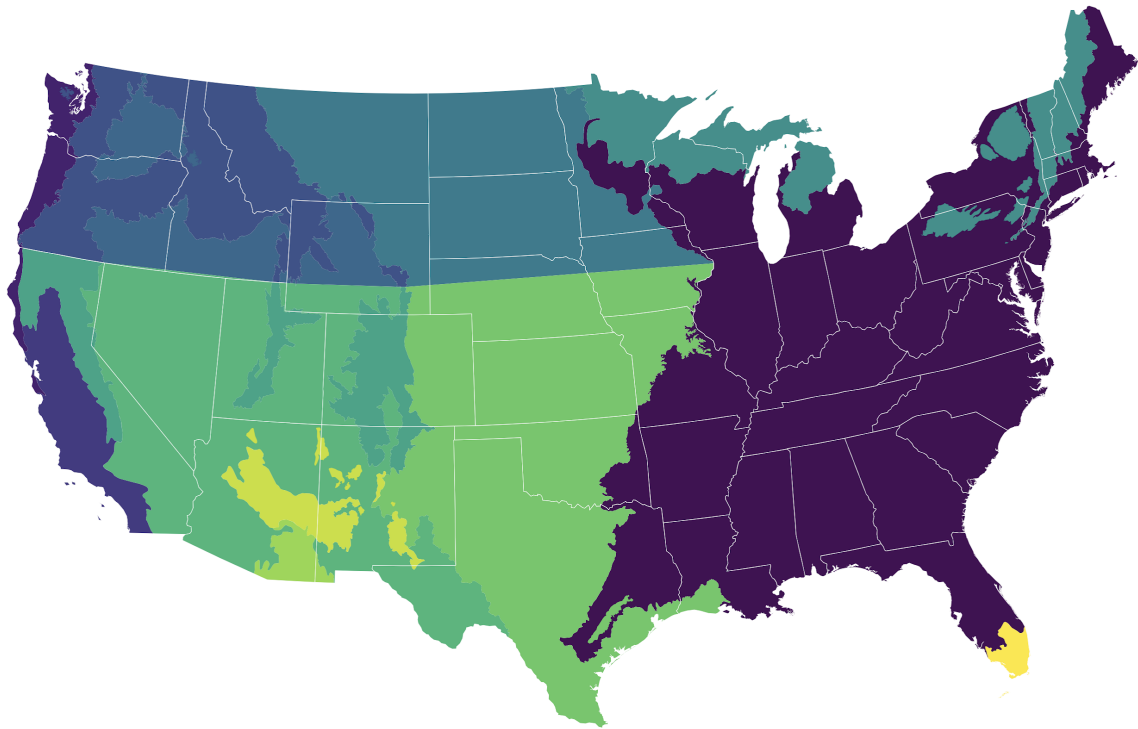

Fig. S1. Ecoregional designations associated with figure 1 in the main document. This map was created with R version 3.6.2 (<https://www.r-project.org/>).

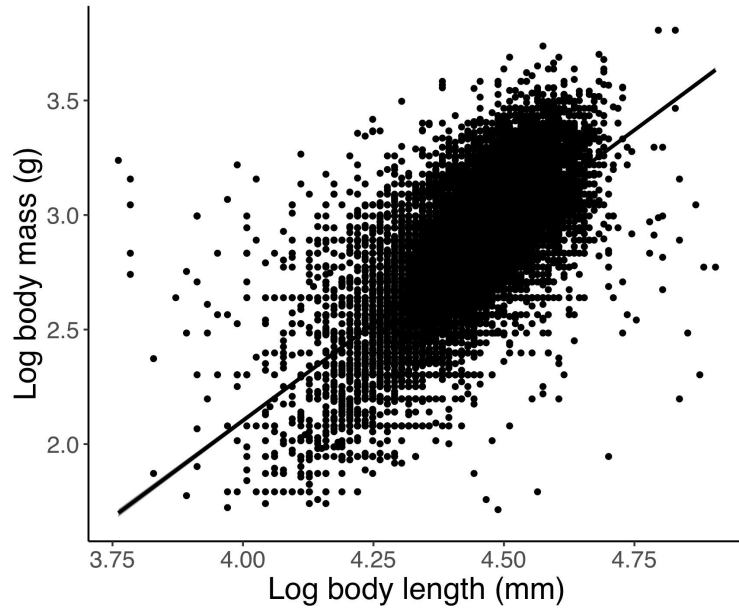

Fig. S2. Scatter plot of the relationship between log(body mass) and log(HB Length).

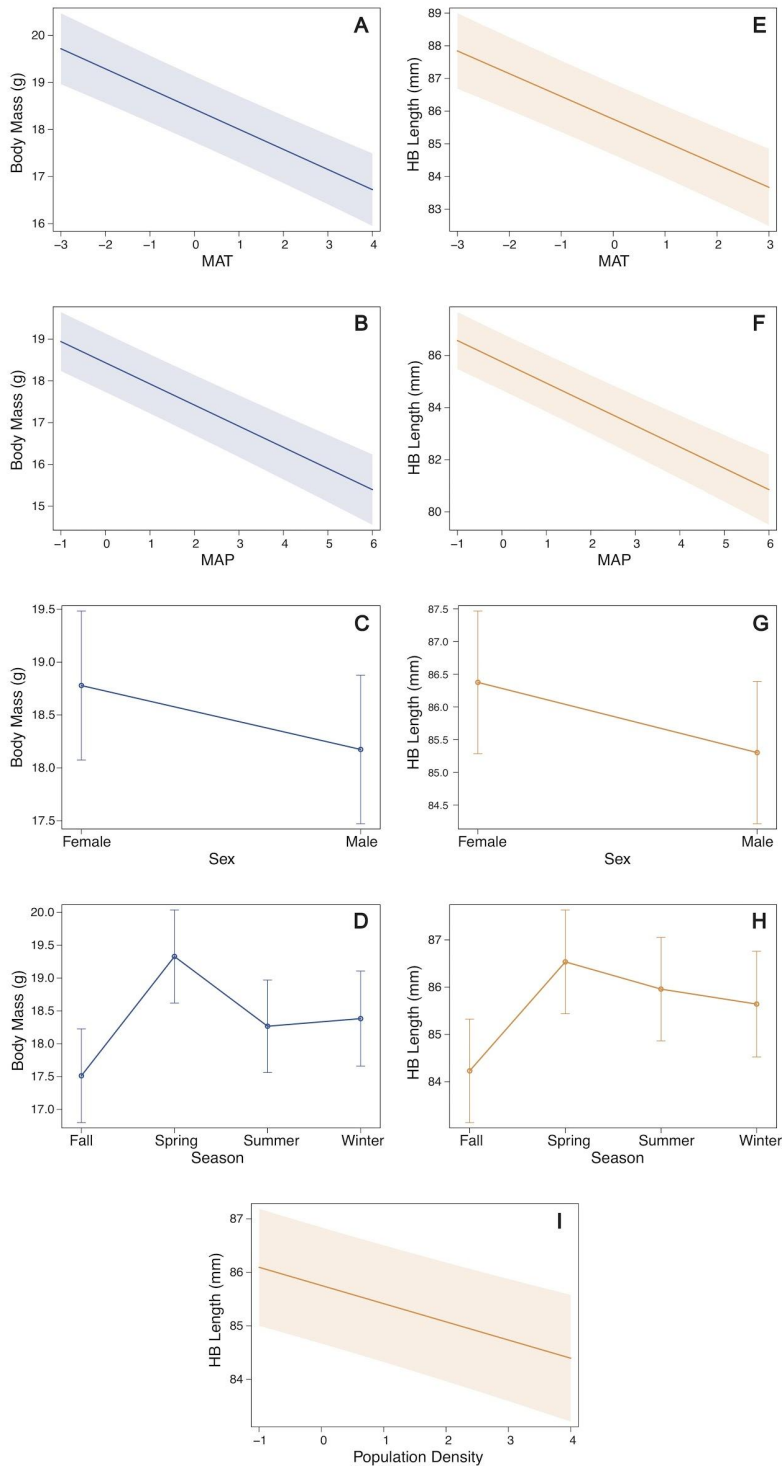

Fig. S3. Top spatial model fixed effect plots demonstrating the effects of MAT, MAP, sex, season, and population density on PEMA (including juveniles, without NEON as a source) body mass (a-d) and HB Length (e-i). 95% confidence intervals are included in each plot.

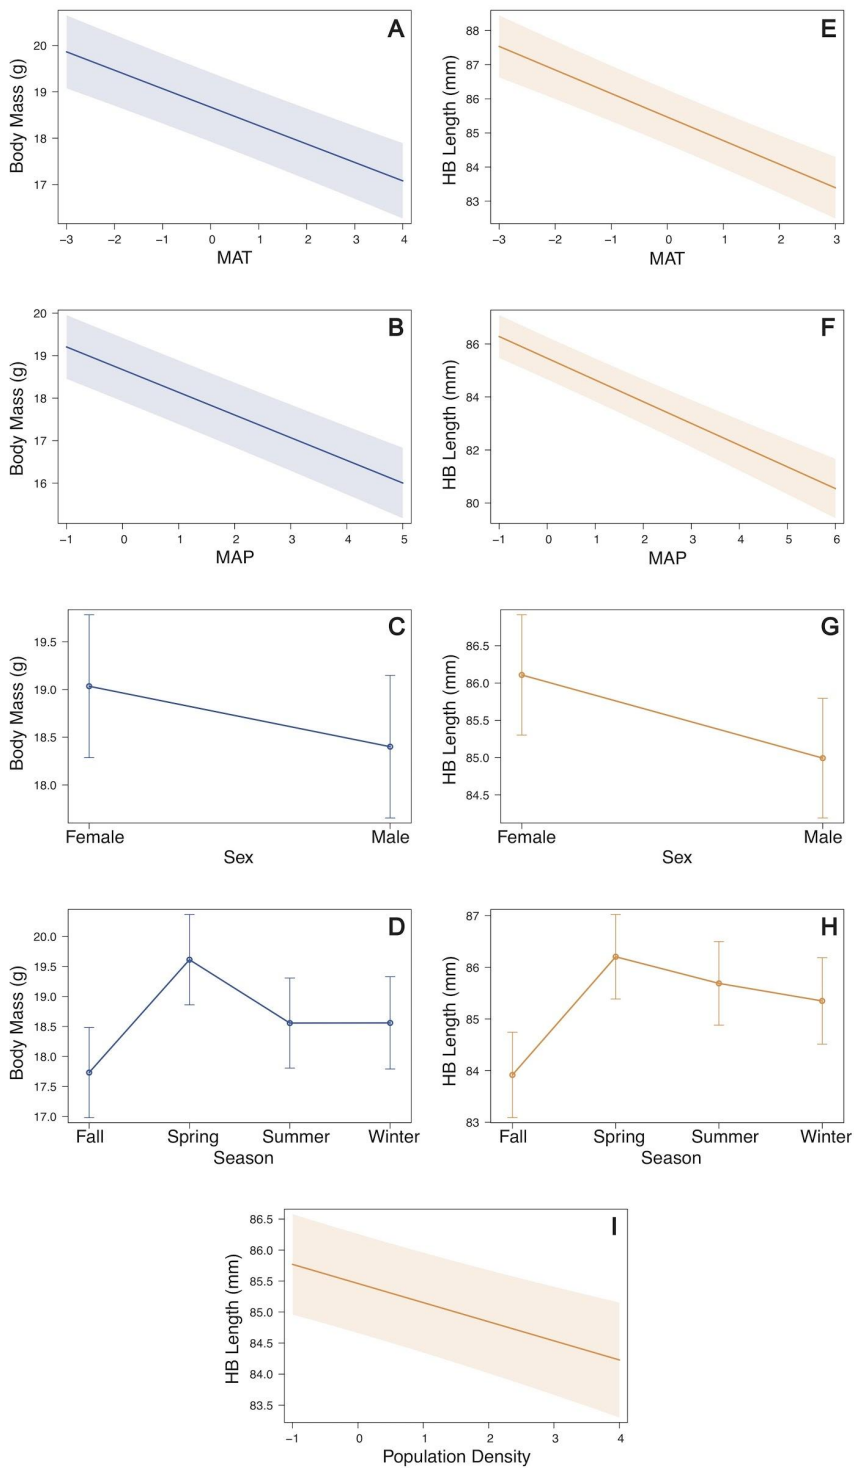

Fig. S4. Top spatial model fixed effect plots demonstrating the effects of MAT, MAP, sex, season, and population density on PEMA (without juveniles and with NEON as a source) body mass (a-d) and HB Length (e-i). 95% confidence intervals are included in each plot.



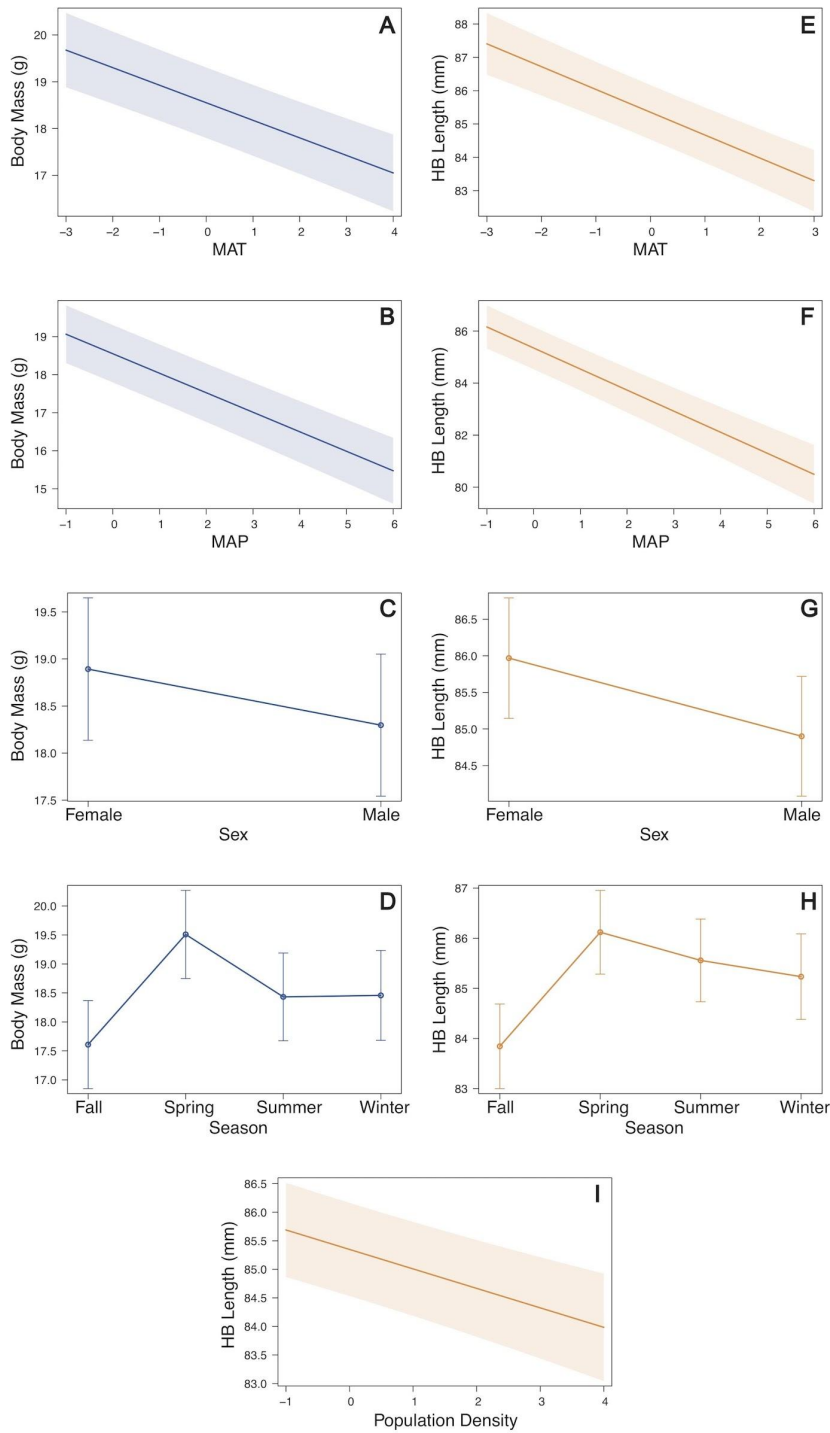

Fig. S5. Top spatial model fixed effect plots demonstrating the effects of MAT, MAP, sex, season, and population density on PEMA (including juveniles and NEON as a source) body mass (a-d) and HB Length (e-i). 95% confidence intervals are included in each plot.

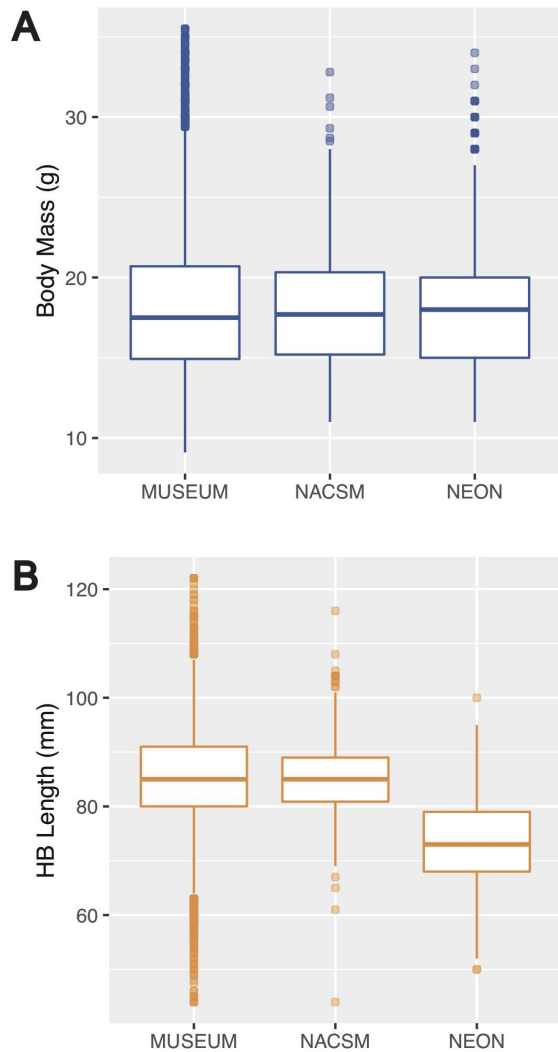

Fig. S6. Boxplots of the random effect of source in spatial models for (A) body mass and (B) HB Length of PEMA (including juveniles). The thick, horizontal line of each box represents the median body size estimate, boxes indicate the interquartile range, and whiskers extend to the largest and smallest body size estimates.

### A. Body Mass

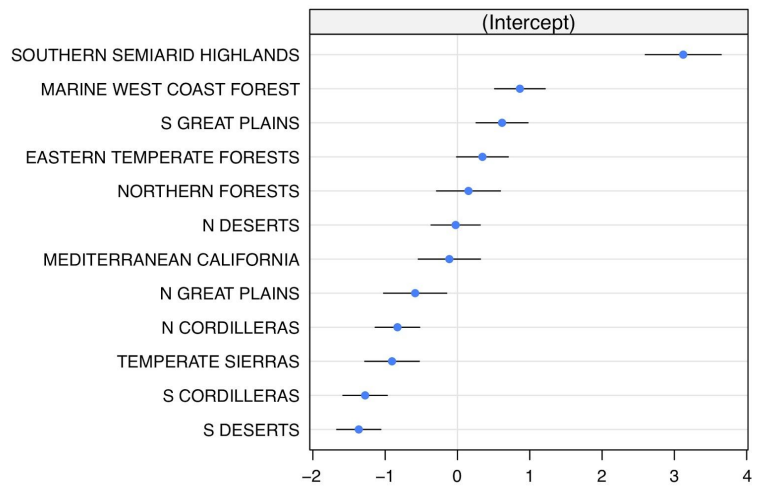

### B. HB Length

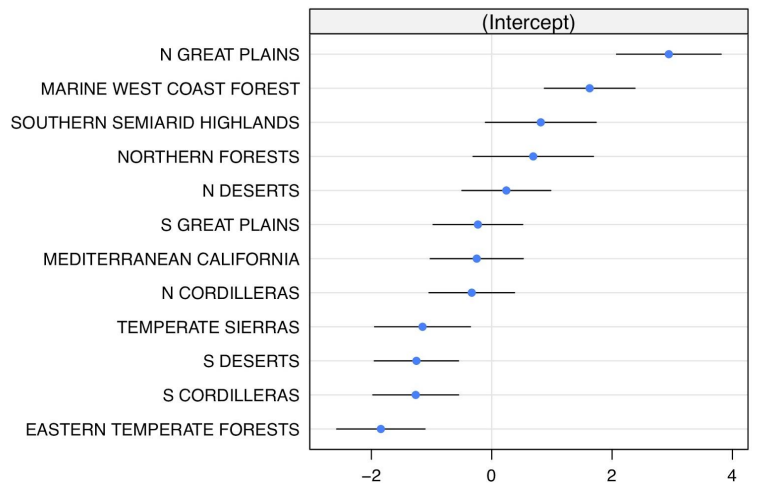

Fig. S7. Caterpillar plots of the random effect of ecoregion in spatial models for (A) body mass and (B) HB Length of PEMA (excluding juveniles and NEON as a source).

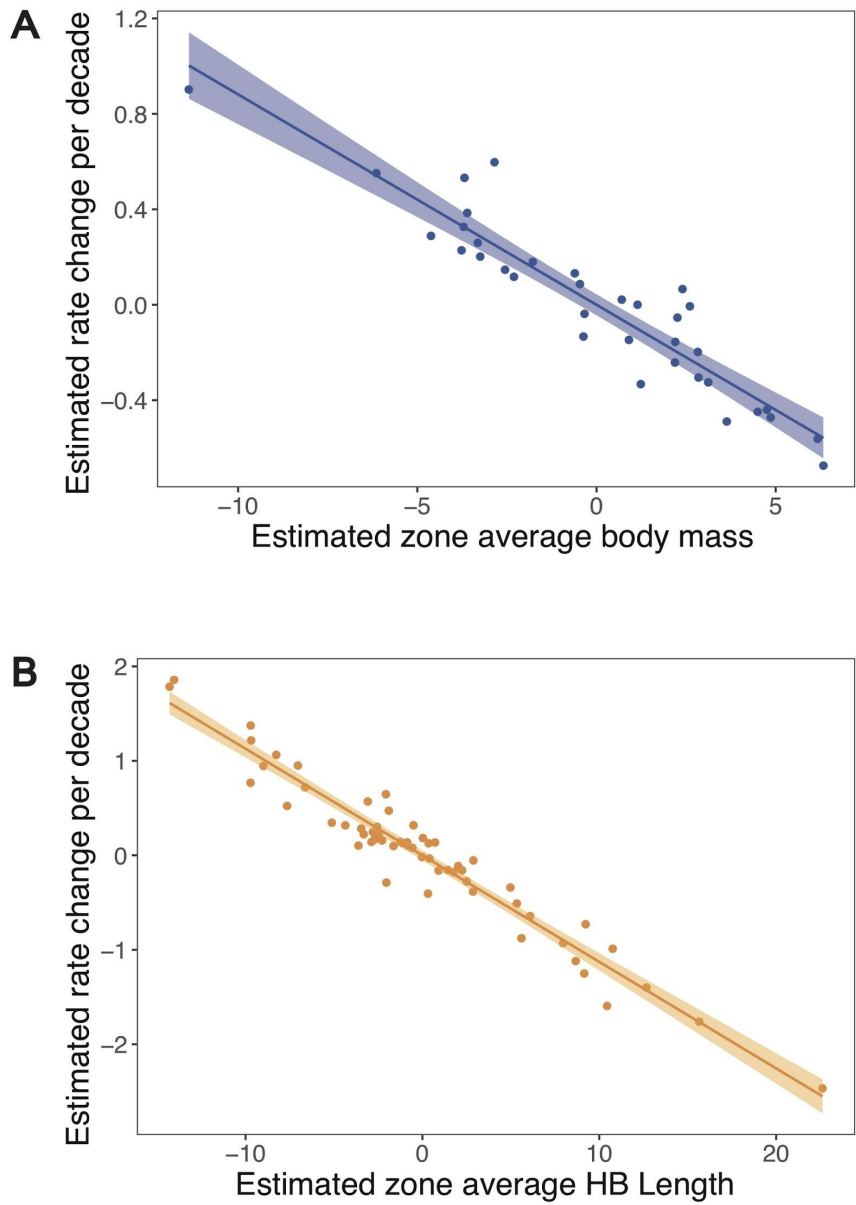

Fig. S8. Scatter plot of the random intercepts of PEMA (A) body mass and (B) HB length against the random slope of decade from the top-ranked temporal models with juveniles.

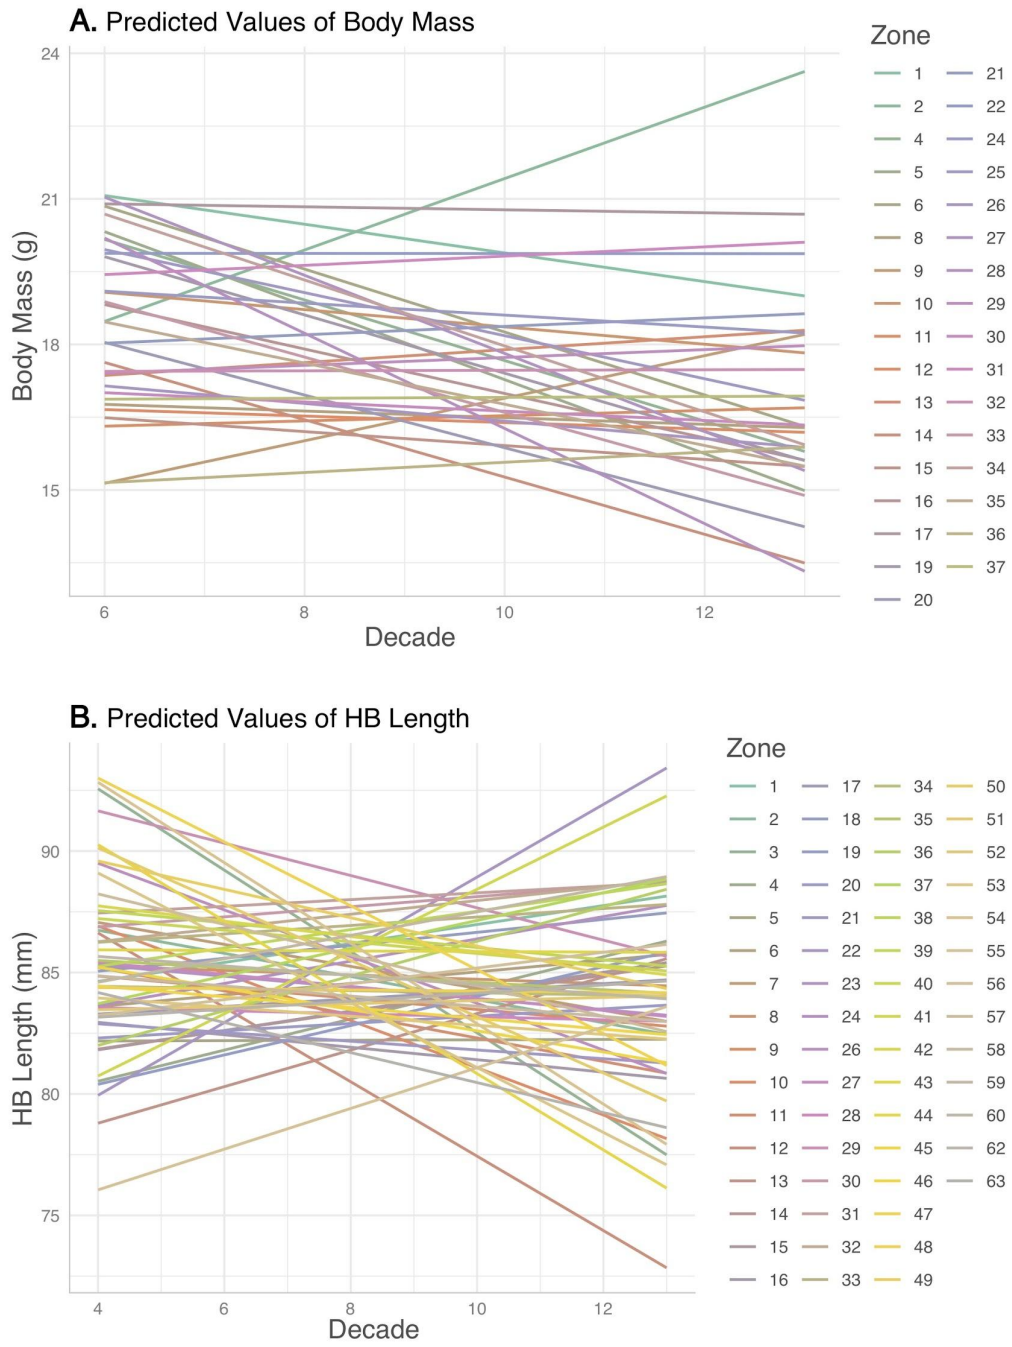

Fig. S9. Top decadal covariate model trends of PEMA (A) body mass and (B) HB Length across decades within each zone.

## SUPPLEMENTARY RESULTS

**Spatial-only models (including juveniles):** PEMA body mass is negatively correlated with increasing MAT ( $\beta = -0.43$ ,  $SE = 0.04$ ,  $p < 0.001$ ; Fig. S3a) and MAP ( $\beta = -0.51$ ,  $SE = 0.04$ ,  $p < 0.001$ ; Fig. S3b), females are larger than males ( $\beta = -0.61$ ,  $SE = 0.06$ ,  $p < 0.001$ ; Fig. S3c), and PEMA body mass is reduced in the fall compared to other seasons (fall-spring  $\beta = 1.82$ ,  $SE = 0.10$ ,  $p < 0.001$ ; fall-summer  $\beta = 0.75$ ,  $SE = 0.09$ ,  $p < 0.001$ ; fall-winter  $\beta = 0.87$ ,  $SE = 0.12$ ,  $p < 0.001$ ; Fig. S3d). HB Length is negatively associated with MAT ( $\beta = -0.70$ ,  $SE = 0.07$ ,  $p < 0.001$ ; Fig. S3e) and MAP ( $\beta = -0.81$ ,  $SE = 0.07$ ,  $p < 0.001$ ; Fig. S3f). Females display a longer HB Length than males ( $\beta = -1.07$ ,  $SE = 0.10$ ,  $p < 0.001$ ; Fig. S3g). PEMA HB Length is shorter in the fall compared to other seasons (fall-spring  $\beta = 2.31$ ,  $SE = 0.17$ ,  $p < 0.001$ ; fall-summer  $\beta = 1.73$ ,  $SE = 0.15$ ,  $p < 0.001$ ; fall-winter  $\beta = 1.41$ ,  $SE = 0.18$ ,  $p < 0.001$ ; Fig. S3h). PEMA HB Length decreased with increasing population density ( $\beta = -0.34$ ,  $SE = 0.06$ ,  $p < 0.001$ ; Fig. S3i).

**Spatial-only models (including NEON as a source):** PEMA body mass is negatively correlated with increasing MAT ( $\beta = -0.40$ ,  $SE = 0.04$ ,  $p < 0.001$ ; Fig. S4a) and MAP ( $\beta = -0.53$ ,  $SE = 0.04$ ,  $p < 0.001$ ; Fig. S4b), females are larger than males ( $\beta = -0.63$ ,  $SE = 0.06$ ,  $p < 0.001$ ; Fig. S4c), and PEMA body mass is reduced in the fall compared to other seasons (fall-spring  $\beta = 1.88$ ,  $SE = 0.09$ ,  $p < 0.001$ ; fall-summer  $\beta = 0.82$ ,  $SE = 0.08$ ,  $p < 0.001$ ; fall-winter  $\beta = 0.83$ ,  $SE = 0.12$ ,  $p < 0.001$ ; Fig. S4d). HB Length is negatively associated with MAT ( $\beta = -0.69$ ,  $SE = 0.07$ ,  $p < 0.001$ ; Fig. S4e) and MAP ( $\beta = -0.82$ ,  $SE = 0.07$ ,  $p < 0.001$ ; Fig. S4f). Females display a longer HB Length than males ( $\beta = -1.12$ ,  $SE = 0.10$ ,  $p < 0.001$ ; Fig. S4g). PEMA HB Length is shorter in the fall compared to other seasons (fall-spring  $\beta = 2.29$ ,  $SE = 0.17$ ,  $p < 0.001$ ; fall-summer  $\beta = 1.77$ ,  $SE = 0.18$ ,  $p < 0.001$ ; fall-winter  $\beta = 1.43$ ,  $SE = 0.18$ ,  $p < 0.001$ ; Fig. S4h). PEMA HB Length decreased with increasing population density ( $\beta = -0.31$ ,  $SE = 0.06$ ,  $p < 0.001$ ; Fig. S4i).

**Spatial-only models (including juveniles and NEON as a source):** PEMA body mass is negatively correlated with increasing MAT ( $\beta = -0.38$ ,  $SE = 0.04$ ,  $p < 0.001$ ; Fig. S5a) and MAP ( $\beta = -0.51$ ,  $SE = 0.04$ ,  $p < 0.001$ ; Fig. S5b), females are larger than males ( $\beta = -0.60$ ,  $SE = 0.06$ ,  $p < 0.001$ ; Fig. S5c), and PEMA body mass is reduced in the fall compared to other seasons (fall-spring  $\beta = 1.90$ ,  $SE = 0.09$ ,  $p < 0.001$ ; fall-summer  $\beta = 0.82$ ,  $SE = 0.08$ ,  $p < 0.001$ ; fall-winter  $\beta = 0.85$ ,  $SE = 0.12$ ,  $p < 0.001$ ; Fig. S5d). HB Length is negatively associated with MAT ( $\beta = -0.68$ ,  $SE = 0.07$ ,  $p < 0.001$ ; Fig. S5e) and MAP ( $\beta = -0.81$ ,  $SE = 0.07$ ,  $p < 0.001$ ; Fig. S5f). Females display a longer HB Length than males ( $\beta = -1.07$ ,  $SE = 0.10$ ,  $p < 0.001$ ; Fig. S5g). PEMA HB Length is shorter in the fall compared to other seasons (fall-spring  $\beta = 2.28$ ,  $SE = 0.17$ ,  $p < 0.001$ ; fall-summer  $\beta = 1.71$ ,  $SE = 0.15$ ,  $p < 0.001$ ; fall-winter  $\beta = 1.39$ ,  $SE = 0.18$ ,  $p < 0.001$ ; Fig. S5h). PEMA HB Length decreased with increasing population density ( $\beta = -0.34$ ,  $SE = 0.06$ ,  $p < 0.001$ ; Fig. S5i).

**Models including decadal covariates (including juveniles):**

We found that PEMA body mass decreases with MAT ( $\beta = -0.37$ ,  $SE = 0.07$ ,  $p < 0.001$ ) and MAP ( $\beta = -1.04$ ,  $SE = 0.08$ ,  $p < 0.001$ ), females display a larger body mass relative to males ( $\beta = -0.58$ ,  $SE = 0.08$ ,  $p < 0.001$ ). Further, PEMA consistently have a smaller body mass in the fall season (fall-spring  $\beta = 1.85$ ,  $SE = 0.14$ ,  $p < 0.001$ ; fall-summer  $\beta = 0.70$ ,  $SE = 0.13$ ,  $p < 0.001$ ; fall-winter  $\beta = 1.86$ ,  $SE = 0.18$ ,  $p < 0.001$ ). We found that PEMA body mass has, overall, decreased over time ( $\beta = -0.21$ ,  $SE = 0.08$ ,  $p = 0.010$  for decade covariate). PEMA HB Length decreases with increasing MAT ( $\beta = -0.73$ ,  $SE = 0.11$ ,  $p < 0.001$ ) and MAP ( $\beta = -0.91$ ,  $SE = 0.11$ ,  $p < 0.001$ ), are shorter in the fall compared to other seasons (fall-spring  $\beta = 2.74$ ,  $SE = 0.21$ ,  $p < 0.001$ ; fall-summer  $\beta = 2.16$ ,  $SE = 0.20$ ,  $p < 0.001$ ; fall-winter  $\beta = 2.29$ ,  $SE = 0.23$ ,  $p < 0.001$ ), and females are longer ( $\beta = -1.02$ ,  $SE = 0.12$ ,  $p < 0.001$ ) than males. PEMA HB Length has decreased over time ( $\beta = -0.35$ ,  $SE = 0.12$ ,  $p = 0.004$  for decade covariate).
